# Supplementary material
Source: publisher figshare collection journal article supplement (https://future-science-group.figshare.com/ndownloader/files/31734482)
Supplement: Supplementary file 1 [file 31734482]

# SUPPLEMENTARY DATA

**Table S1.** Intervention Sequences

| **Intervention Sequence** | **Period 1 Intervention** | **Period 2 Intervention** | **Period 3 Intervention** |
| --- | --- | --- | --- |
| I | A | B | C |
| II | A | C | B |
| III | B | A | C |
| IV | B | C | A |
| V | C | A | B |
| VI | C | B | A |

Intervention A: single-dose atogepant 60 mg.

Intervention B: single-dose sumatriptan 100 mg.

Intervention C: coadministration of single-dose atogepant 60 mg with single-dose sumatriptan 100 mg.
